# Supplementary figures and images for: Major Cuban Green Turtle Rookeries: Identification of Management Units and Their Genetic Relationships with Other Greater Caribbean Populations
Source: MDPI journal article supplement (doi:10.3390/d15050586), 2023-04-23

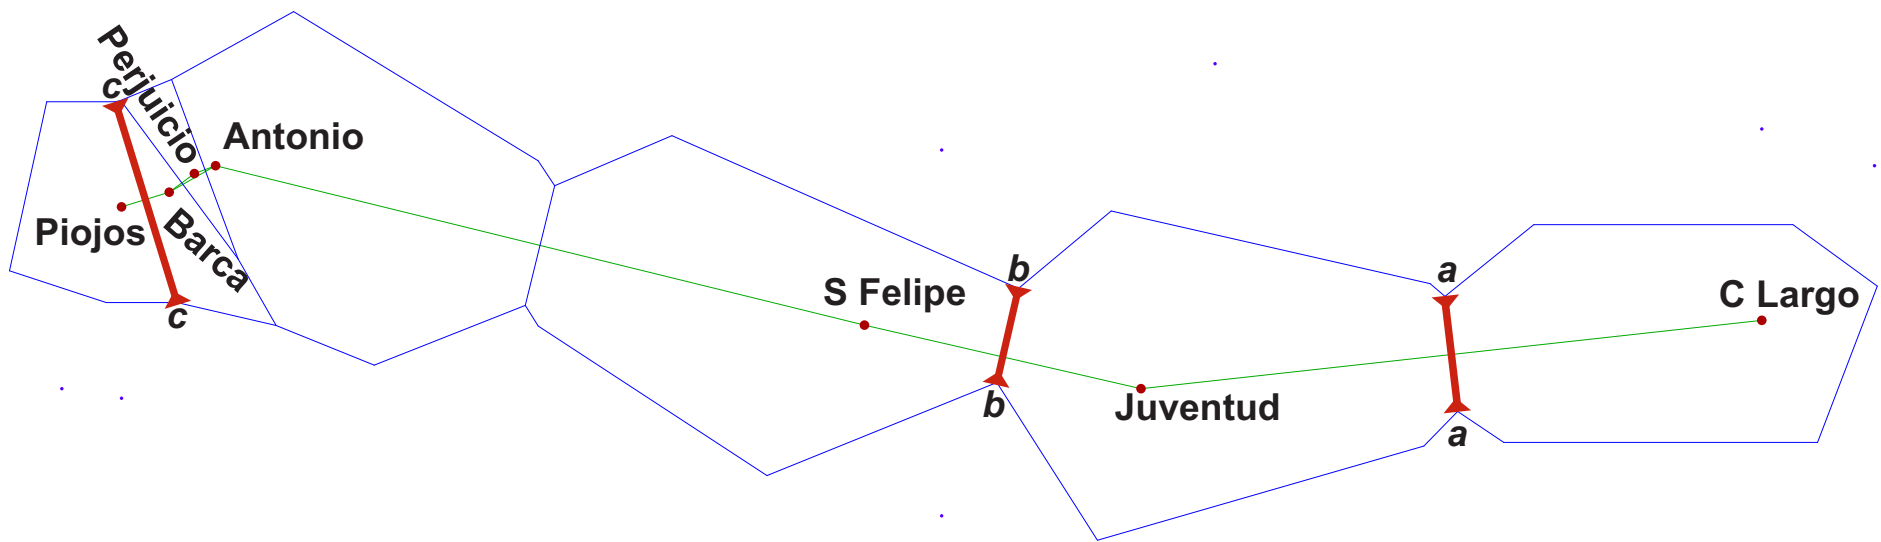

Supplement: s1 [file s1]
